# Supplementary material
Source: Springer Nature journal article supplement (https://www.springermedizin.de/resource/supplementary/12873_2013_191_MOESM1_ESM.pdf/9431594)
Supplement: MOESM1 [file 9431594]

**Table 1: Item-specific consensus estimates between the group of observers and participants**

| Questions (items) of the Mayo High Performance Teamwork Scale |                                                                                                                                                                                    | Kappa-value | agreement | not applicable |
|---------------------------------------------------------------|------------------------------------------------------------------------------------------------------------------------------------------------------------------------------------|-------------|-----------|----------------|
| 1                                                             | Do you feel that the leader was recognized by all team members ?                                                                                                                   | 0.872       | very good | 0              |
| 2                                                             | Do you think the leader assured maintenance of an appropriate balance between command authority and team member participation ?                                                    | 0.625       | good      | 0              |
| 3                                                             | Do you feel that each team member demonstrated clear understanding of his/her role ?                                                                                               | 0.862       | very good | 0              |
| 4                                                             | Do you think the team prompted each other to attend to all significant clinical indicators throughout the scenario ?                                                               | 0.714       | good      | 0              |
| 5                                                             | Do you think team members verbalized their activities loud when they were actively involved with the patient ?                                                                     | 1.0         | perfect   | 0              |
| 6                                                             | Do you feel that team members repeated back or paraphrased instructions and clarifications to indicate that they heard them correctly ?                                            | 0.614       | good      | 0              |
| 7                                                             | Do you think team members referred to established protocols and checklists for the procedure/intervention ?                                                                        | 0.294       | fair      | 0              |
| 8                                                             | Do you feel that all members of the team were appropriately involved and participated in the activity ?                                                                            | 0.259       | fair      | 0              |
| 9                                                             | Do you feel that disagreement of conflicts among team members were adressed without a loss of situation awareness ?                                                                | 1.0         | perfect   | 75%            |
| 10                                                            | Do you think roles were shifted to adress urgent or emergent events when appropriate ?                                                                                             | 0.846       | very good | 0              |
| 11                                                            | Do you think team members acknowledged their lack of understanding and asked for repetition and clarification when directions were unclear ?                                       | 0.333       | fair      | 19%            |
| 12                                                            | Do you feel that team members acknowledged – in a positive manner – statements directed at avoiding or containing errors or seeking clarification ?                                | 0.471       | moderate  | 25%            |
| 13                                                            | Do you think team member called attention to actions that they feeled could cause errors of complications ?                                                                        | 0.111       | poor      | 50%            |
| 14                                                            | Do you think team members responded to potential errors or complications with procedures that avoided the error or complication ?                                                  | 1.0         | perfect   | 56%            |
| 15                                                            | Do you think team members persisted seeking a response when statements directed at avoiding or containing errors or complications did not elicit a response or contain the error ? | 0           | none      | 63%            |
| 16                                                            | Do you think team members asked each other for assistance prior to or during periods of task overload ?                                                                            | 0.4         | fair      | 6%             |
